# Supplementary material
Source: publisher figshare collection journal article supplement (https://frontiersin.figshare.com/ndownloader/files/14809901)
Supplement: Supplementary file [file 14809901]

UNIVERSITY OF ILLINOIS  
AT URBANA - CHAMPAIGN

Department of Kinesiology & Community Health

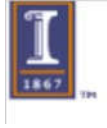

Louise Freer Hall  
906 South Goodwin Avenue  
Urbana, IL 61801-3895  
<http://www.kines.uiuc.edu>  
Telephone 217-300-1022

July 16<sup>th</sup>, 2018.

**MEDICAL RELEASE (control group)**

To the physician of \_\_\_\_\_ D.O.B. \_\_\_\_\_

Your patient has expressed interested in participating in a study investigating the effects of a training protocol eye saccade performance. Outcome measures include eye saccade latency prior to an involuntary/voluntary saccade, saccade duration, and saccade amplitude. The protocol involves a large TV that will display targets arranged in circles of varying sizes meant to train eye movements up to 50 degrees of the participant's field of view. Participants will be asked to make approximately 120 saccades over the course of 30 min. There will be a total of eight training sessions and two assessment sessions. As an initial measure, we screen each applicant prior to training. We ask for your assistance in approving your patient's participation in the study. Please complete the approval form if, in your medical judgment, this individual has no contraindications to participation in this study. If you have any questions please do not hesitate to contact the principal investigator in the study, [REDACTED]

Thank you for your help.

**To be completed by the participant**

Date\_\_\_\_\_

Name\_\_\_\_\_

Address\_\_\_\_\_

City/State/Zip\_\_\_\_\_

Phone(\_\_\_\_\_)\_\_\_\_\_E-mail\_\_\_\_\_

Date of Birth(MM/DD/YYYY)\_\_\_\_\_

Primary Diagnosis\_\_\_\_\_

Date of Diagnosis(MM/DD/YYYY)\_\_\_\_\_

Emergency Contact Name\_\_\_\_\_

Relationship\_\_\_\_\_ Phone #(\_\_\_\_\_)\_\_\_\_\_

Do you have any allergies? (please specify) \_\_\_\_\_

Have you ever been diagnosed with the following?

Diabetes(Y/N)\_\_\_\_(Insulin?\_\_\_\_) Parkinson's disease\_\_\_\_Hypertension\_\_\_\_\_

Pulmonary Disease\_\_\_\_20/20 or Corrected Vision\_\_\_\_ Retinal Disease(specify)\_\_\_\_\_

Glaucoma\_\_\_\_ Ischemic Optic Neuropathy\_\_\_\_ Pseudoxfoliation Syndrome\_\_\_\_\_

Ocular Surgery\_\_\_\_ Ocular Trauma\_\_\_\_ Cataracts\_\_\_\_ Orbital myostitis\_\_\_\_ Hoehn and  
Yahr score\_\_\_\_\_

Other (explain)\_\_\_\_\_

Are you receiving outpatient therapy? (Y/N)\_\_\_\_\_

Have you undergone brain surgery? (Y/N) \_\_\_\_\_

Surgeries/Dates \_\_\_\_\_

\_\_\_\_\_

Medications (List)

\_\_\_\_\_

\_\_\_\_\_

\_\_\_\_\_

\_\_\_\_\_

Change in use of disease modifying therapy in the last 6 months? (Y/N) \_\_\_\_\_

By signing this document, I give permission to have my physician mail a medical release form

to \_\_\_\_\_

\_\_\_\_\_

\_\_\_\_\_

Signature \_\_\_\_\_ Date \_\_\_\_\_

**To be completed by the participant's physician:**

Participant's Name\_\_\_\_\_

Diagnosis(List All)\_\_\_\_\_

Mobility Impairments

\_\_\_\_\_  
\_\_\_\_\_

Height\_\_\_\_\_ Weight\_\_\_\_\_ Pulse\_\_\_\_\_ BP\_\_\_\_\_ Sex\_\_\_\_\_

| Physical Exam | Normal | Abnormal | Explanation of Abnormalities |
|---------------|--------|----------|------------------------------|
|---------------|--------|----------|------------------------------|

|           |       |       |       |
|-----------|-------|-------|-------|
| Head/Neck | _____ | _____ | _____ |
|-----------|-------|-------|-------|

|             |       |       |       |
|-------------|-------|-------|-------|
| Eyes/Vision | _____ | _____ | _____ |
|-------------|-------|-------|-------|

|              |       |       |       |
|--------------|-------|-------|-------|
| Ears/Hearing | _____ | _____ | _____ |
|--------------|-------|-------|-------|

|            |       |       |       |
|------------|-------|-------|-------|
| Heart/Lung | _____ | _____ | _____ |
|------------|-------|-------|-------|

|      |       |       |       |
|------|-------|-------|-------|
| G.U. | _____ | _____ | _____ |
|------|-------|-------|-------|

|        |       |       |       |
|--------|-------|-------|-------|
| C.N.S. | _____ | _____ | _____ |
|--------|-------|-------|-------|

|      |       |       |       |
|------|-------|-------|-------|
| Skin | _____ | _____ | _____ |
|------|-------|-------|-------|

Dates of hospitalization over last two years with admitting diagnoses:

\_\_\_\_\_  
\_\_\_\_\_

Significant "ABNORMAL TEST" (EKG/XRAY/LAB):\_\_\_\_\_

Medications

Has there been a change in use of disease modifying therapy in the past 6 months

YES\_\_\_\_\_NO\_\_\_\_\_

If yes, specify\_\_\_\_\_

Initiation of medications that influence walking/mobility/coordination in the past 30 days?

YES\_\_\_\_\_NO\_\_\_\_\_

Approval for participation: YES\_\_\_\_\_NO\_\_\_\_\_

Comments/Restrictions:\_\_\_\_\_

\_\_\_\_\_

\_\_\_\_\_

\_\_\_\_\_

Address:\_\_\_\_\_

City:\_\_\_\_\_State:\_\_\_\_\_ZIP:\_\_\_\_\_

Physician's Signature:\_\_\_\_\_Date:\_\_\_\_\_

Thank you for your time to read this summary and evaluate your patient's status for participation in this study.

Permission to release patient information to the

[REDACTED]

[REDACTED] can be found on page 6.

MAIL TO:

[REDACTED]  
[REDACTED]  
[REDACTED]  
[REDACTED]  
[REDACTED]  
[REDACTED]

THANK YOU FOR YOUR PARTICIPATION.
